# Supplementary material for: Terrestrial records of glacial terminations V and IV and insights on deglacial mechanisms
Source: Copernicus journal article supplement (doi:10.5194/cp-2021-161), 2021-12-07
Supplement: Supplementary file 1 [file cp-2021-161-supplement.pdf]

1 **Terrestrial records of glacial terminations V and IV and insights on**  
2 **deglacial mechanisms**

3

4 **F. Marra<sup>1\*</sup>, A. Pereira<sup>2,3</sup>, B. Jicha<sup>4</sup>, S. Nomade<sup>5</sup>, I. Biddittu<sup>6</sup>, F. Florindo<sup>1</sup>, G.**  
5 **Muttoni<sup>7</sup>, E.M. Niespolo<sup>8,9</sup>, P.R. Renne<sup>8,9</sup>, V. Scao<sup>5</sup>**

6 <sup>1</sup> Istituto Nazionale di Geofisica e Vulcanologia, Rome, Italy

7 <sup>2</sup> Université Paris-Saclay, CNRS UMR 8148, GEOPS, France

8 <sup>3</sup> Département Hommes et environnements, Muséum national d'Histoire naturelle,  
9 Paris, France

10 <sup>4</sup>Department of Geoscience, University of Wisconsin-Madison, USA

11 <sup>5</sup> CEA Saclay, LSCE, UMR-8212, UVSQ-IPSL et Université Paris Saclay, Gif-  
12 sur-Yvette Cedex, France

13 <sup>6</sup> Istituto Italiano di Paleontologia Umana, Anagni, Italy

14 <sup>7</sup> Department of Earth Sciences, University of Milan, Milan, Italy

15 <sup>8</sup> Department of Earth and Planetary Science, University of California,  
16 Berkeley, USA

17 <sup>9</sup> Berkeley Geochronology Center, Berkeley, USA

18

19 \*Corresponding author: [fabrizio.marra@ingv.it](mailto:fabrizio.marra@ingv.it)

20 ORCID ID [0000-0002-4881-9563](https://orcid.org/0000-0002-4881-9563)

21

22

23

24 **Supplementary Material #1A - <sup>40</sup>Ar-<sup>39</sup>Ar full methods**

25 Samples for <sup>40</sup>Ar/<sup>39</sup>Ar analyses, both those dated for the present study and  
26 those from previous literature, were prepared at the Laboratoire des  
27 Sciences du Climat et de l'Environnement facility (CNRS-CEA, Gif-sur-Yvette),  
28 France, and at the University of Wisconsin-Madison.

29 Three distinct irradiations have been performed and the samples were dated  
30 in three facilities (Berkeley Geochronology Center, USA), Laboratoire des  
31 Sciences du Climat et de l'Environnement (CEA, Saclay), WiscAr Laboratory  
32 of Wisconsin University (USA).

33 For the previously dated samples we remand to Marra et al. (2020) (CA-GCT,  
34 CA-C1), Pereira et al. (2018) (Isoletta 1, Isoletta 2, Isoletta 3, Lademagne 1,  
35 Lademagne 2, Cava Pompei), and Nomade et al. (2011) (Ceprano).

36 All the ages reported in the main text have been (re)calibrated to ACs  
37 standard age of 1.1848 Ma (Niespolo et al., 2017).

38

39

40

## 1 **Sample preparation protocol**

2 Whole rock samples prepared at the Laboratoire des Sciences du Climat et de  
3 l'Environnement facility (CEA Saclay, France) were crushed, sieved and then  
4 cleaned in distilled water in an ultrasonic bath. Clean portions coarser than  
5 840  $\mu\text{m}$  ( $> 20$  mesh) and ranging between 840 and 600  $\mu\text{m}$  (30-20 mesh)  
6 were selected to extract suitable minerals. When available, at least 50  
7 transparent and unaltered K-feldspars were carefully handpicked under a  
8 binocular for each sample after a magnetic separation. When it was possible  
9 to recognize unaltered ones, leucites were also picked. To eliminate potential  
10 adhering groundmass residues on the selected minerals, the latter were  
11 finally leached with a 5-7 % HF acid solution and cleaned several times using  
12 distilled water in an ultrasonic bath.

13 Samples prepared at the University of Madison were crushed and sieved to a  
14 250-500  $\mu\text{m}$  size fraction. Inclusion-free sanidine was isolated using a Frantz  
15 magnetic separator and hand-picking under a binocular microscope. The  
16 selected crystals were cleaned for 3 min in a 10% HF solution and then  
17 rinsed repeatedly in deionized water.

18

## 19 **Irradiations**

20 Samples PO-C6, BL-1A, BL-5, and PI-1, PI-2 were irradiated for one hour and  
21 two hours respectively in the Cd-lined, in-core CLICIT facility of the Oregon  
22 State University TRIGA reactor (IRR number 482 and IRR COO2). Standard  
23 flux monitor ACs-2 were co-irradiated to calculate the neutron fluence (J  
24 value) for each sample. Interference corrections were based on the following  
25 nucleogenic production ratios (Renne et al., 2015):  $(^{40}\text{Ar}/^{39}\text{Ar})_{\text{K}} = (7.30 \pm$   
26  $0.92)10^{-4}$ ;  $(^{37}\text{Ar}/^{39}\text{Ar})_{\text{K}} = (2.24 \pm 0.16)10^{-4}$ ;  $(^{38}\text{Ar}/^{39}\text{Ar})_{\text{K}} = (1.196 \pm 0.013)10^{-$   
27  $2$ ;  $(^{39}\text{Ar}/^{37}\text{Ar})_{\text{Ca}} = (7.02 \pm 0.12)10^{-4}$ ;  $(^{36}\text{Ar}/^{37}\text{Ar})_{\text{Ca}} = (2.702 \pm 0.004)10^{-2}$ ;  
28  $^{36}\text{Cl}/^{38}\text{Cl} = (2.628 \pm 0.002)10^2$ .

29 Samples BL-4, CE-1, and CE-2 were irradiated for 1.5 hours in the Cd-lined,  
30 in-core CLICIT facility of the Oregon State University TRIGA reactor. Neutron  
31 flux monitor ACs-2 was co-irradiated with the sample. Interference  
32 corrections were based on the following nucleogenic production ratios (Jicha  
33 and Brown, 2014; Renne et al., 2013):  $(^{40}\text{Ar}/^{39}\text{Ar})_{\text{K}} = (5.40 \pm 1.40)10^{-4}$ ;  
34  $(^{37}\text{Ar}/^{39}\text{Ar})_{\text{K}} = (2.24 \pm 0.16)10^{-4}$ ;  $(^{38}\text{Ar}/^{39}\text{Ar})_{\text{K}} = (1.210 \pm 0.022)10^{-2}$ ;

1  $(^{39}\text{Ar}/^{37}\text{Ar})_{\text{Ca}} = (6.95 \pm 0.09)10^{-4}$ ;  $(^{36}\text{Ar}/^{37}\text{Ar})_{\text{Ca}} = (2.65 \pm 0.002)10^{-2}$ ;  $^{36}\text{Cl}/^{38}\text{Cl} =$   
2  $(2.628 \pm 0.002)10^2$ .

3

#### 4 **BGC analytical processes**

5 Analyses for samples PO-C6, BL-1A, BL-5 were conducted at the Berkeley  
6 Geochronology Center (BGC, USA) using a MAP 215 mass spectrometer (MAP  
7 1) equipped with a Nier-type source, a Balzers electron multiplier detectors  
8 and retractable Faraday cups. After irradiation, samples were separately  
9 transferred into a UHV chamber mounted in an automated x-y stage. Crystals  
10 were then totally fused using a CO<sub>2</sub> laser (7 Watts) in order to extract the  
11 argon. The extracted gas was then purified of other gases on a fully-  
12 automated line equipped with two C-50 getters and a cryogenic condensation  
13 trap. Ion beams were measured both using magnetic field switching to  
14 cyclically measure all argon isotopes from <sup>36</sup>Ar to <sup>40</sup>Ar in 15 cycles of peak-  
15 hopping on the electron multipliers operated in analog mode. For each  
16 sample neutron J fluence was calculating using co-irradiated flux standards  
17 Alder Creek Sanidine (ACs-2, Nomade et al., 2005) with an age of 1.1848 ±  
18 0.0006 Ma (1σ, Niespolo et al., 2017) and the K total decay constant of Min et  
19 al., (2000). J values calculated for each sample are the following: BL-1A:  
20  $J = 2.548 \text{ E } -04 \pm 4.06 \text{ E } -07$ , PO-C6:  $J = 2.577 \text{ E } -04 \pm 3.67 \text{ E } -07$ , BL-5:  $J = 2.549$   
21  $\text{ E } -04 \pm 5.29 \text{ E } -07$ . Procedural blank measurements were performed before  
22 and after every unknown. Individual blanks were  $4\text{-}5 \times 10^{-16}$ ,  $8\text{-}9 \times 10^{-18}$ , and  
23  $1\text{-}2 \times 10^{-19}$  mol for <sup>40</sup>Ar, <sup>39</sup>Ar and <sup>36</sup>Ar, respectively. Because the variation in  
24 the time series of blanks exceeds the uncertainty in a single blank  
25 measurement, blank corrections to data require fitting to account for  
26 variability in blanks. We use a simple arithmetic mean and standard  
27 deviation of ~40 to 100's blank measurements over time throughout the  
28 analytical sequence to blank-correct bracketed unknown sample  
29 measurements (Supp. File 1). Mass discrimination was calculated based on  
30 automated analyses of air pipettes between every five single-grain analyses  
31 (plus intercalated blanks) using air pipette data based on a power law  
32 correction (Renne et al., 2009) and the atmospheric <sup>40</sup>Ar/<sup>36</sup>Ar value of 298.56  
33 (Lee et al, 2006). Measurements and data reduction were made using the

1 software mass-spec developed by BGC and run on a Macintosh computer  
2 (Mass Spec, version 8.132; A. Deino).

3

#### 4 **LSCE analytical processes**

5 After irradiations, samples PI-1 and PI-2 analyzed at the Laboratoire des  
6 Sciences du Climat et de l'Environnement (CEA, Saclay) were separately  
7 transferred in a copper sample holder and put into a double vacuum window.  
8 Crystals were individually fused using a CO<sub>2</sub> laser (25 W, using 10% of the  
9 nominal power). Extracted gases were purified by two GP 110 getters (ZrAl)  
10 and argon isotopes measured using a micromass 5400 mass spectrometer  
11 equipped with an electron multiplier Balzers 217 SEV SEN coupled with an  
12 ion counter (full analytical protocol is detailed in Nomade et al., 2010).  
13 Neutron J fluence for each sample was calculating using co-irradiated Alder  
14 Creek Sanidine (ACs-2, Nomade et al., 2005) with an age of  $1.1891 \pm 0.0008$   
15 Ma ( $1\sigma$ , Niespolo et al., 2017) and the K total decay constant of Renne et al.,  
16 (2011). Procedural blank measurements were performed after every three  
17 unknown samples. Mass discrimination correction was monitored by  
18 measurements of air argon of various beam sizes and was calculated relative  
19 to a  $^{40}\text{Ar}/^{36}\text{Ar}$  ratio of 298.56 (Lee et al., 2006). Ages provided were finally  
20 recalculated according an age of  $1.1848 \text{ ACs} \pm 0.0006 \text{ Ma}$  ( $1\sigma$ , Niespolo et al.,  
21 2017) to be consistent with the main text.

22

#### 23 **University of Wisconsin-Madison analytical processes**

24 Analyses for samples CE-1, CE-2 and BL-4 were conducted at the WiscAr  
25 Laboratory using a Noblesse 5-collector mass spectrometer. Individual  
26 crystals were fused using a 50W CO<sub>2</sub> laser, and the extracted gas was then  
27 cleaned using two GP-50 getters and a cryogenic condensation trap.  
28 Analytical routine follows that described in Jicha et al. (2016). For each  
29 sample neutron fluence parameter J was calculating using co-irradiated flux  
30 standards Alder Creek Sanidine (ACs = 1.1864 Ma; Jicha et al., 2016) and the  
31 K total decay constant of Min et al., (2000). Procedural blank measurements  
32 were performed after every unknown. The atmospheric values of Lee et al,  
33 (2006) were used for age calculations.

34

1 REFERENCES

2  
3 Jicha, B.R., B.S. Singer, and P. Sobol (2016), Re-evaluation of the ages of  
4  $^{40}\text{Ar}/^{39}\text{Ar}$  sanidine standards and supereruptions in the western U.S. using  
5 a Noblesse multi-collector mass spectrometer, *Chemical Geology* 431, 54–66.

6  
7 Jicha, B.R., Brown, F.H., 2014. An age for the Korath Range, Ethiopia and the  
8 viability of  $^{40}\text{Ar}/^{39}\text{Ar}$  dating of kaersutite in Late Pleistocene volcanics  
9 *Quaternary Geochronology* 21, 53-57. DOI: [10.1016/j.quageo.2013.03.007](https://doi.org/10.1016/j.quageo.2013.03.007)

10  
11 Kuiper, K.F., Deino, A., Hilgen, F.J., Krijgsman, W., Renne, P.R., Wijbrans, J.R.,  
12 2008. Synchronizing Rock Clocks of Earth History, *Science* 320, 500 – 504.

13  
14 Lee, J.Y., Marti, K., Severinghaus, J.P., Kawamura, K., Hee - -Soo, Y., Lee, J.B.,  
15 Kim, J.S., 2006. A redetermination of the isotopic abundances of atmospheric  
16 Ar. *Geochimica et Cosmochimica Acta* 70, 4507-4512.  
17 doi:10.1016/j.gca.2006.06.1563.

18  
19 Min, K.W., Mundil, R., Renne, P.R., Ludwig, K.R., 2000. A test for systematic  
20 errors in  $^{40}\text{Ar}/^{39}\text{Ar}$  geochronology through comparison with U/Pb analysis  
21 of a 1.1-Ga rhyolite. *Geochim. Cosmochim. Acta* 64, 73-98.

22  
23 Niespolo, E.M., Rutte, D., Deino, A.L., & Renne, P.R., 2017, Intercalibration and  
24 age of the Alder Creek sanidine  $^{40}\text{Ar}/^{39}\text{Ar}$  standard, *Quaternary*  
25 *Geochronology* 39, 205 – 213, doi: 10.1016/j.quageo.2016.09.004

26  
27 Nomade, S., Renne, P.R., Vogel, N., Deino, A.L., Sharp, W.D., Becker, T.A., Jaouni,  
28 A.R., Mundil, R., 2005. Alder Creek sanidine (ACs-2): a Quaternary  $^{40}\text{Ar}/^{39}\text{Ar}$   
29 dating standard tied to the Cobb Mountain geomagnetic event. *Chem. Geol.*  
30 218, 315-338.

31  
32 Nomade, S., Gauthier, A., Guillou, H., Pastre, J.F., 2010.  $^{40}\text{Ar}/^{39}\text{Ar}$  temporal  
33 framework for the Alleret maar lacustrine sequence (French Massif Central):  
34 volcanological and Paleoclimatic implications. *Quat. Geochronol.* 5, 20-27.

35  
36 Renne P. R., Deino A. L., Hames, W.E., Heizler, M.T., Hemming, S.R., Hodges,  
37 K.V., Koppers, A.a.P., Mark, D.F., Morgan, L.E., Phillips, D., Singer, B.S., Turrin,  
38 B.D., Villa, I.M., Villeneuve, M., Wijbrans, J.R., 2009. Data reporting norms for  
39  $^{40}\text{Ar}/^{39}\text{Ar}$  geochronology. *Quaternary Geochronology* 4, 346–352.

40  
41 Renne, P.R., Deino, A.L., Hilgen, F.J., Kuiper, K.F., Mark, D.F., Mitchell III, W.S.,  
42 Morgan, L.E., Mundil, R., Smit, J. 2013. Time scales of critical events around  
43 the cretaceous-Paleogene boundary. *Science* 339 (6120), 684-687.

44  
45 Renne, P.R., Sprain, C.J., Richards, M.A., Self, S., Vanderkluysen, L., Pande, K.,  
46 2015. State shift in Deccan volcanism at the Cretaceous-Paleogene boundary,  
47 possibly induced by impact. *Science* 350, 76-78.

48  
49  
50

1 **Terrestrial records of glacial terminations V and IV and insights on**  
2 **deglacial mechanisms**

3

4 **F. Marra<sup>1\*</sup>, A. Pereira<sup>2,3</sup>, B. Jicha<sup>4</sup>, S. Nomade<sup>5</sup>, I. Biddittu<sup>6</sup>, F. Florindo<sup>1</sup>, G.**  
5 **Muttoni<sup>7</sup>, E.M. Niespolo<sup>8,9</sup>, P.R. Renne<sup>8,9</sup>, V. Scao<sup>5</sup>**

6 <sup>1</sup> Istituto Nazionale di Geofisica e Vulcanologia, Rome, Italy

7 <sup>2</sup> Université Paris-Saclay, CNRS UMR 8148, GEOPS, France

8 <sup>3</sup> Département Hommes et environnements, Muséum national d'Histoire naturelle,  
9 Paris, France

10 <sup>4</sup>Department of Geoscience, University of Wisconsin-Madison, USA

11 <sup>5</sup> CEA Saclay, LSCE, UMR-8212, UVSQ-IPSL et Université Paris Saclay, Gif-sur-  
12 Yvette Cedex, France

13 <sup>6</sup> Istituto Italiano di Paleontologia Umana, Anagni, Italy

14 <sup>7</sup> Department of Earth Sciences, University of Milan, Milan, Italy

15 <sup>8</sup> Department of Earth and Planetary Science, University of California, Berkeley,  
16 USA

17 <sup>9</sup> Berkeley Geochronology Center, Berkeley, USA

18

19 \*Corresponding author: [fabrizio.marra@ingv.it](mailto:fabrizio.marra@ingv.it)

20 ORCID ID [0000-0002-4881-9563](https://orcid.org/0000-0002-4881-9563)

21

22

23 **Supplementary Material #1B - Age data and interpretations**

24

25 **1. Dating of detrital minerals in sedimentary deposits**

26 <sup>40</sup>Ar/<sup>39</sup>Ar single-grain dating of detrital minerals has been used in regional-  
27 scale provenance studies on the erosional record, as well as in reconstructing the  
28 exhumation processes (e.g., Brewer et al., 2003; Ruhl and Hodges, 2005;  
29 Germignani et al., 2018, 2019; Malusà and Garzanti, 2019). More recently, Marra  
30 et al. (2019) have used cooling ages of detrital sanidine grains extracted from  
31 sedimentary deposits in central Italy to provide *terminus post-quem* (maximum  
32 ages) to the time of their deposition, aimed at establishing correlation of  
33 Tyrrhenian Sea coastal terraces with Marine Isotope Stage (MIS) sea-level  
34 highstands. Application of such method relies on the exceptional deliverance of  
35 k-rich eruptive products during the Middle-Upper Pleistocene activity of the  
36 volcanic districts of the Roman Magmatic Region (central Italy), which includes  
37 the volcanic districts of Vulcini, Vico, Monti Sabatini, Colli Albani, Volsci,  
38 Roccamonfina, Phlegraean Fields and Somma-Vesuvio (Peccerillo, 2017). In  
39 particular, sanidine represents a mineral species characterized by high  
40 resistance to mechanical and chemical alteration, which is largely present in  
41 these volcanic products (Peccerillo, 2017, and references therein). Due to the  
42 continuous eruptive activity that characterized this volcanic region during this  
43 time span, dating of sedimentary samples has revealed an extremely useful tool  
44 to assess the age of aggradational successions deposited in response to sea-level  
45 rise during glacial terminations (Marra et al., 2016 and ref. therein) in the  
46 absence of intercalated, primary tephra layers (see Marra et al., 2019, for an in-  
47 depth discussion). In fact, when a statistically significant number of crystals is

1 dated (i.e., 30-40 grains), it is reasonable to assume that the age of the youngest  
 2 crystal population, besides providing a maximum age for the sedimentary  
 3 deposit, also should be regarded as documenting the lack of crystals from  
 4 younger eruptive products, providing a minimum age (*terminus ante-quem*) to  
 5 the time of deposition. As discussed in Marra et al. (2019), the youngest  
 6 eruptions should be better represented in reworked, sedimentary deposits  
 7 because their products crop out in wider areas than the old ones, which are  
 8 buried under a longer sequence of strata. This consideration supports the  
 9 principle that the age of a layer is bracketed between the ages of its youngest  
 10 crystal population and of the next younger eruption, whose crystals do not occur  
 11 in the layer but is widely documented in the area.  
 12 Hereby we discuss the interpretation of the maximum ages derived from dating  
 13 of four sedimentary samples: CA-CGT (dated in Marra et al., 2021), CE-1, CE-2,  
 14 BL-5 (dated in the present study).

### 15 16 1.1 Sample CA-CGT

17 24 crystals extracted from the sand matrix of a ca. 2 m thick gravel layer  
 18 cropping out at Colle Avorone locality (Sample CA-CGT) were dated by Marra et  
 19 al. (2021). 3 youngest crystals provided a weighted mean age of  $359.5 \pm 6.5$  ka  
 20 ( $2\sigma$  uncertainty). Other 21 crystals provided two groups of ages, the largest one  
 21 (14 grains) ranging 359 - 450 ka, with other six crystals spanning 700 - 850 ka.  
 22 The younger group of ages matches the duration of the main eruptive phase  
 23 occurred at the Volsci Volcanic Field (VVF)  $424 \pm 13$ –  $349.5 \pm 5.0$  ka (Marra et al.,  
 24 2021).

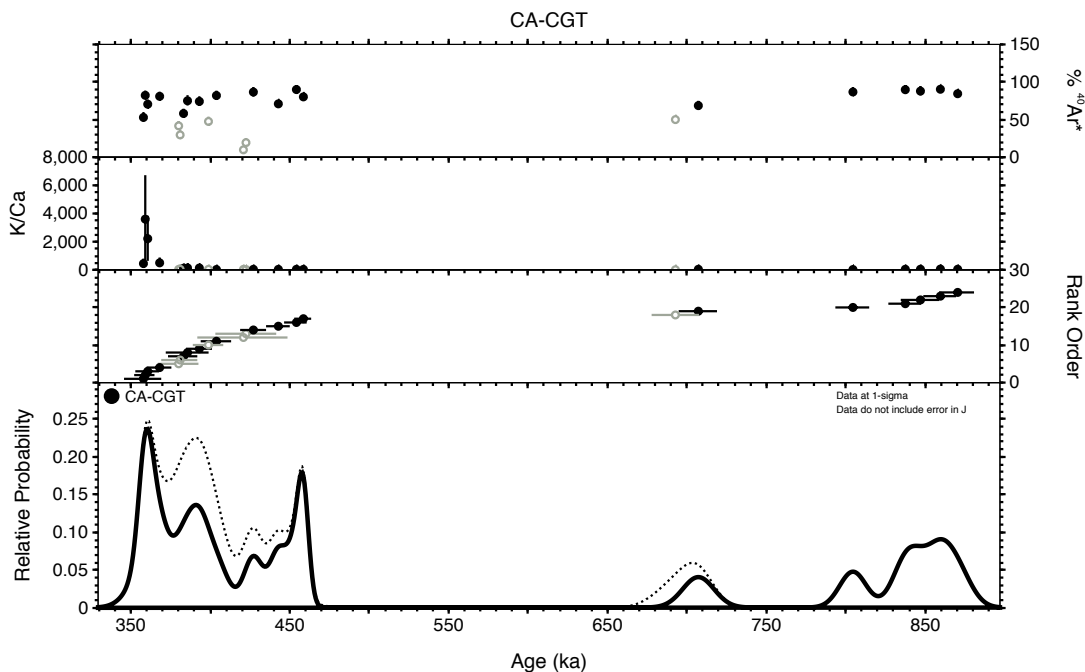

26 27 Figure S1. Open circles indicate crystals with  $^{40}\text{Ar}^* < 50\%$  which are excluded  
 28 from the statistics (full black line in inset d) (see Marra et al., 2021 for  
 29 discussion).

30 31 Regarding the older crystal ages, it should be noted that five samples from  
 32 phreatomagmatic deposits analyzed in Marra et al. (2021) yielding weighted

1 mean ages in the interval  $761.5 \pm 9.5$  -  $349.5 \pm 5.0$  ka evidenced significant  
2 dispersion towards old ages (Figure S2). These products were mainly sourced  
3 from isolated, monogenetic eruptive centers. Therefore, it is unlikely that the  
4 older age values might have derived from earlier buried volcanic edifices or  
5 erupted deposits, and yet may provide evidence of older magma batches that  
6 cooled in sub-surface conditions.

7

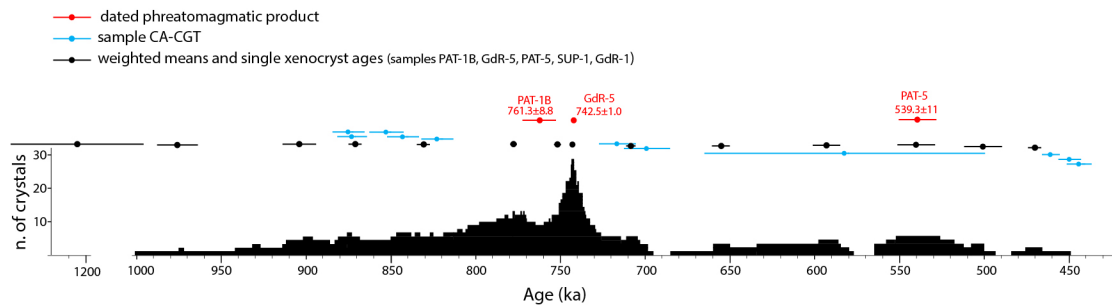

8

9 Figure S2 - Histogram showing crystal age distribution of the dated samples.

10

11

12

### 13 **Samples CE-1, CE-2 (this work)**

14 Sample CE-1 was collected in borecore Ceprano 1 at 39.3 m depth within a  
15 coarse gravel layer with abundant sand matrix. The youngest crystal out of a  
16 population of 30 extracted from this sediment yielded a  $^{40}\text{Ar}/^{39}\text{Ar}$  age of  
17  $452.4 \pm 1.8$  ka ( $2\sigma$  uncertainty). Sample CE-2 was collected at 15.1 m depth in  
18 borehole Ceprano 2, at the base of a coarse sand layer and yielded a youngest  
19 crystal date of  $389.6 \pm 2.7$  ka ( $2\sigma$  uncertainty).



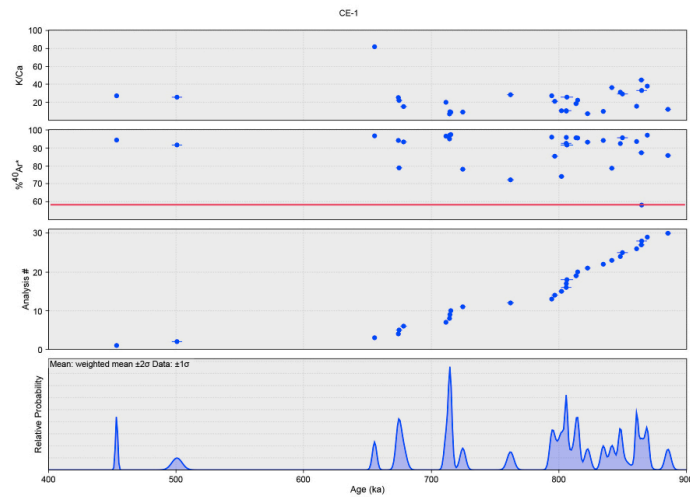

1

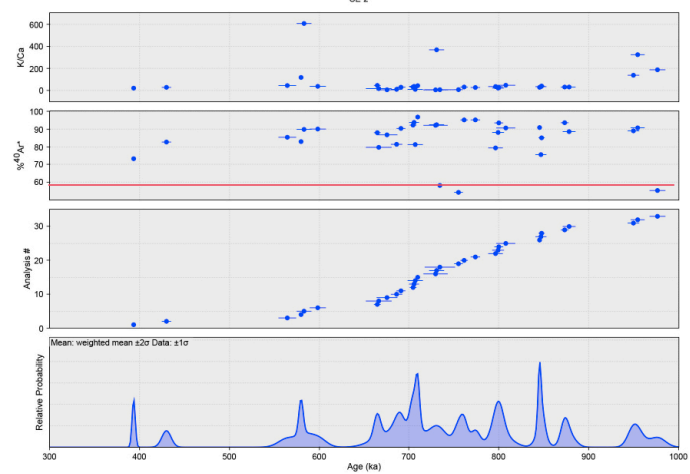

2

3 Figure S3 – Relative probability diagrams of crystal ages for samples CE-1, CE-2.

4

5 These two maximum ages can be regarded as statistically significant even if  
 6 based on one single crystal. The Ceprano boreholes were drilled in Campogrande  
 7 which is located on the left hydrographic side of the Sacco catchment basin, a  
 8 sector draining the most active and densely vent-populated volcanic area of the  
 9 Volsci Volcanic Field. A climactic eruptive phase occurred at the VVF in the  
 10 interval 420 - 350 ka<sup>9</sup>, so the lack of crystals younger than 453 ka is strongly  
 11 suggesting that the emplacement of the sand deposit occurred before the start of  
 12 this volcanic phase. Consistent with this hypothesis, there is one crystal of  
 13 428±10 ka along one youngest crystal of 390±3.6 ka in the sample  
 14 stratigraphically above. Moreover, these two ages along with that of 350.8±8 ka  
 15 on the primary layer occurring at the top of the sedimentary succession  
 16 recovered in the Ceprano boreholes (Nomade et al., 2011) provide a constant  
 17 sedimentation rate of 38 cm/ky (see Figure 4 in the main text), which accounts  
 18 for the exactness of these ages.

19 Therefore, it is reasonable to assume that also the maximum ages derived from  
 20 reworked sanidine crystals can be regarded as providing precise time  
 21 constraints to sediment deposition, as the one on the primary volcanic layer.  
 22 Indeed, and age close to 453 ka for the gravel deposition during MIS 11 is in  
 23 perfect agreement with the constraints provided from the Paleo-Tiber  
 24 aggradational successions, which bracket it between 451±2 and 445±3 ka (Marra  
 25 et al., 2021, see Figure 8 in the main text).

1  
2  
3  
4  
5  
6  
7

#### Sample BL-5 (this work)

Sample BL-5 was collected in a sandy-clayey travertine layer embedding several sub-cm sized, very altered volcanic scoriae. Crystal extracted from this sample yielded two distinct groups of ages.

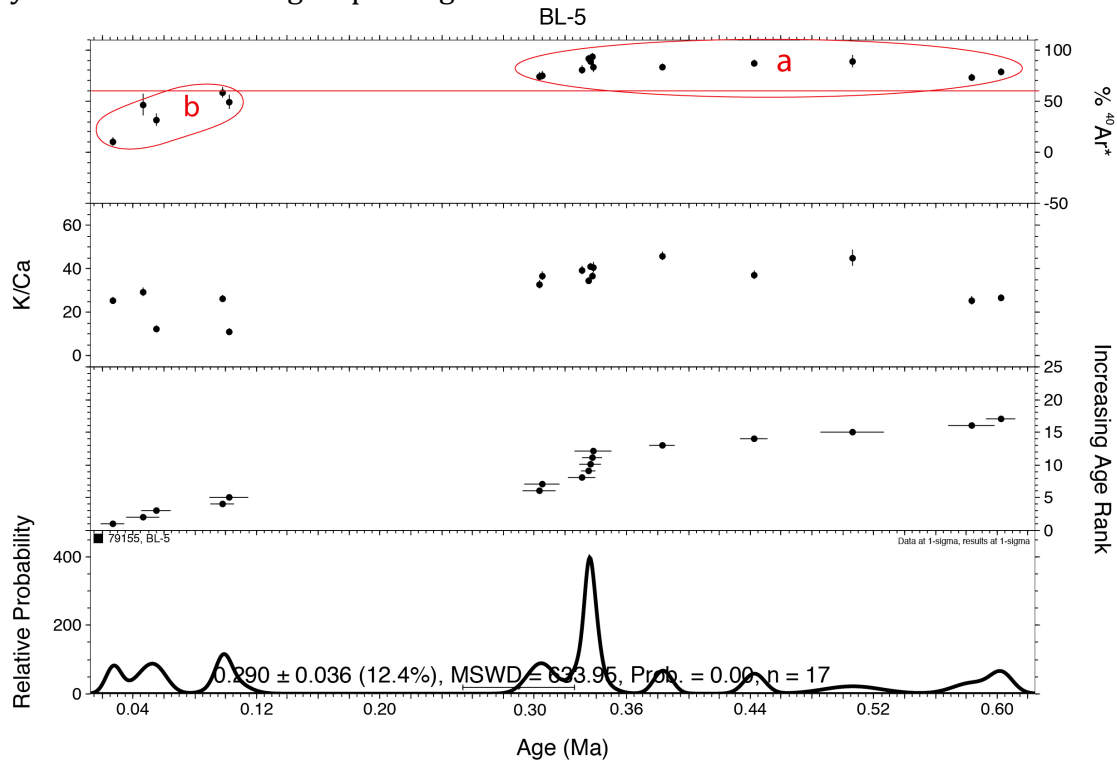

8  
9  
10

Figure S4 - Relative probability diagram of crystal ages for sample BL-5

11 One group of older ages ranging 300 - 600 ka ("a") is consistent with expected  
12 distribution for a deposit reworking the volcanic deposit of the Volsci Volcanic  
13 Field (VVF), the activity of which broadly spanned the interval 750-250 ka, as  
14 also observed in the sedimentary samples CE-1 and CE-2 (see Figure S2). The  
15 occurrence of one second group of ages ranging 120 - 30 ka ("b") is problematic  
16 to explain, given the much unlikely circumstance that it may reflect the real age  
17 of the deposit. Indeed, the travertine layer occurs on top of the "lower lacustrine  
18 succession", closely constrained at this location by tephra ages of 538 and 517  
19 ka, and is part of the "upper fluvial-lacustrine succession" which previous  
20 (Devoto, 1965) and the present study constrain between 390 and ca. 300 ka.  
21 Therefore, two hypotheses can be made to explain the second group of crystal  
22 ages.

23 The anomalously young ages most probably represent much younger ash fall  
24 and/or eolian material that was worked into the deposit through fractures;  
25 indeed, the sampled deposit was exposed on a slightly inclined surface in the  
26 middle of a hillside, which is affected by continuous sliding of reworked  
27 sediments from the uphill section.

28 Alternatively, these anomalous young ages may result from contamination in the  
29 field or laboratory.

1 In any case, we consider the weighted mean age of  $300\pm 12$  ka yielded by the two  
2 youngest crystals in group "a" as a reliable maximum age for the deposit.  
3  
4  
5  
6  
7  
8  
9  
10  
11  
12  
13  
14  
15  
16  
17  
18  
19  
20

1 REFERENCES

2  
3 Brewer, I.D., Burbank, D.W., Hodges, K.V., 2003. Modelling detrital cooling-age popu-  
4 lations: Insights from two Himalayan catchments. *Basin Res.* 15 (3), 305–320.  
5 <https://doi.org/10.1046/j.1365-2117.2003.00211.x>.

6  
7 Devoto, G., 1965. Lacustrine Pleistocene in the lower Liri Valley (southern Latium).  
8 *Geologica Romana* 4, 291–368.

9  
10 L. Gemignani, K.F. Kuiper, J.R. Wijbrans, Xilin Sun, A. Santato, 2019. Improving the  
11 precision of single grain mica  $^{40}\text{Ar}/^{39}\text{Ar}$ -dating on smaller and younger muscovite  
12 grains: Application to provenance studies. *Chemical Geology* 511 (2019) 100–111.

13  
14 Gemignani, L., van der Beek, P.A., Braun J., Najman, Y., Bernet, M., Garzanti, E. Wijbrans,  
15 J.R., (2018). Downstream evolution of the thermochronologic age signal in the  
16 Brahmaputra catchment (eastern Himalaya): Implications for the detrital record of  
17 erosion. *Earth Planet. Sci. Lett.* 499, 48–61, doi:[https://doi.org/10.1016/j.epsl.2018.](https://doi.org/10.1016/j.epsl.2018.07.019)  
18 07.019.

19  
20 Malusà, M.G., Garzanti, E., 2019. the sedimentology of detrital thermochronology. In:  
21 Malusà, M.G., and Fitzgerald (eds.), *Fission-Tracks Thermochronology and its*  
22 *Application to Geology*, Springer textbook in Earth Sciences. Geography and  
23 Environment. [https://doi.org/10.1007/978-3-319-89421-8\\_7](https://doi.org/10.1007/978-3-319-89421-8_7).

24  
25 Marra, F., Rohling, E.J., Florindo, F., Jicha, B., Nomade, S., Pereira, A., Renne, P.R., 2016a.  
26 Independent  $^{40}\text{Ar}/^{39}\text{Ar}$  and  $^{14}\text{C}$  age constraints on the last five glacial terminations  
27 from the aggradational successions of the Tiber River, Rome (Italy). *Earth Planet Sci.*  
28 *Lett.* 449, 105-117. doi:10.1016/j.epsl.2016.05.037

29  
30 Marra, F. Gaeta, M. Jicha, B.R. Nicosia, C. Tolomei, C. Ceruleo, P. Florindo, F. Gatta, M. La  
31 Rosa, M. Rolfo, M.F., 2019b. MIS 9 to MIS 5 terraces along the Tyrrhenian Sea coast of  
32 Latium (central Italy): assessing interplay between sea-level oscillations and tectonic  
33 movements, *Geomorphology* 346: 106843. DOI:[10.1016/j.geomorph.2019.106843](https://doi.org/10.1016/j.geomorph.2019.106843)

34  
35 Marra, F., Cardello, L., Gaeta, M., Jicha, B., Montone, P., Niespolo, E., Nomade, S.,  
36 Palladino, D.M., Pereira, A., De Luca, G., Florindo, F., Frepoli, A., Renne, P., Sottili, G., 2021.  
37 The Volsci Volcanic Field (central Italy): an open window on continental subduction  
38 processes, *International Journal of Earth Sciences* 110:689–718. DOI:10.1007/s00531-  
39 021-01981-6

40  
41 Nomade, S., Muttoni, G., Guillou, H., Robin, E. & Scardia, G., 2011. First  $^{40}\text{Ar}/^{39}\text{Ar}$  age of  
42 the Ceprano man (central Italy). *Quat. Geochronol.* 6, 453-457.

43  
44 Marra, F., Pereira, A., Boschian, G., Nomade, S., 2021. MIS 13 and MIS 11 aggradational  
45 successions of the Paleo-Tiber delta: geochronological constraints to sea-level  
46 fluctuations and to the Acheulean sites of Castel di Guido and Malagrotta (Rome, Italy),  
47 *Quaternary International*

48  
49 Peccerillo, A. Cenozoic Volcanism in the Tyrrhenian Sea Region in *Advances in*  
50 *Volcanology*, pp. 399; 10.1007/978-3-319-42491-0 (Springer International Publishing,  
51 2017).

52

1 Ruhl, K.W., Hodges, K.V., 2005. The use of detrital mineral cooling ages to evaluate  
2 steady state assumptions in active orogens: an example from the central Nepalese  
3 Himalaya. *Tectonics* 24 (4), 1-14. <https://doi.org/10.1029/2004TC001712>.  
4  
5

1  
2  
3  
4  
5  
6  
7  
8  
9  
10  
11  
12  
13  
14  
15  
16  
17  
18  
19  
20  
21  
22  
23  
24  
25  
26  
27  
28

**Terrestrial records of glacial terminations V and IV and insights on deglacial mechanisms**

**F. Marra<sup>1\*</sup>, A. Pereira<sup>2,3</sup>, B. Jicha<sup>4</sup>, S. Nomade<sup>5</sup>, I. Biddittu<sup>6</sup>, F. Florindo<sup>1</sup>, G. Muttoni<sup>7</sup>, E.M. Niespolo<sup>8,9</sup>, P.R. Renne<sup>8,9</sup>, V. Scao<sup>5</sup>**

<sup>1</sup> Istituto Nazionale di Geofisica e Vulcanologia, Rome, Italy

<sup>2</sup> Université Paris-Saclay, CNRS UMR 8148, GEOPS, France

<sup>3</sup> Département Hommes et environnements, Muséum national d'Histoire naturelle, Paris, France

<sup>4</sup>Department of Geoscience, University of Wisconsin-Madison, USA

<sup>5</sup> CEA Saclay, LSCE, UMR-8212, UVSQ-IPSL et Université Paris Saclay, Gif-sur-Yvette Cedex, France

<sup>6</sup> Istituto Italiano di Paleontologia Umana, Anagni, Italy

<sup>7</sup> Department of Earth Sciences, University of Milan, Milan, Italy

<sup>8</sup> Department of Earth and Planetary Science, University of California, Berkeley, USA

<sup>9</sup> Berkeley Geochronology Center, Berkeley, USA

\*Corresponding author: [fabrizio.marra@ingv.it](mailto:fabrizio.marra@ingv.it)

ORCID ID [0000-0002-4881-9563](https://orcid.org/0000-0002-4881-9563)

**Supplementary Material #3 - Stratigraphic sections**

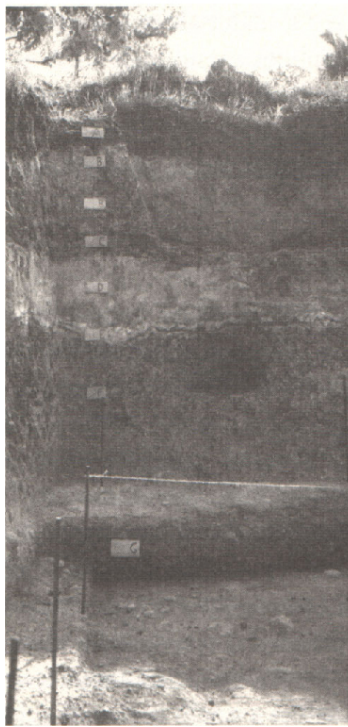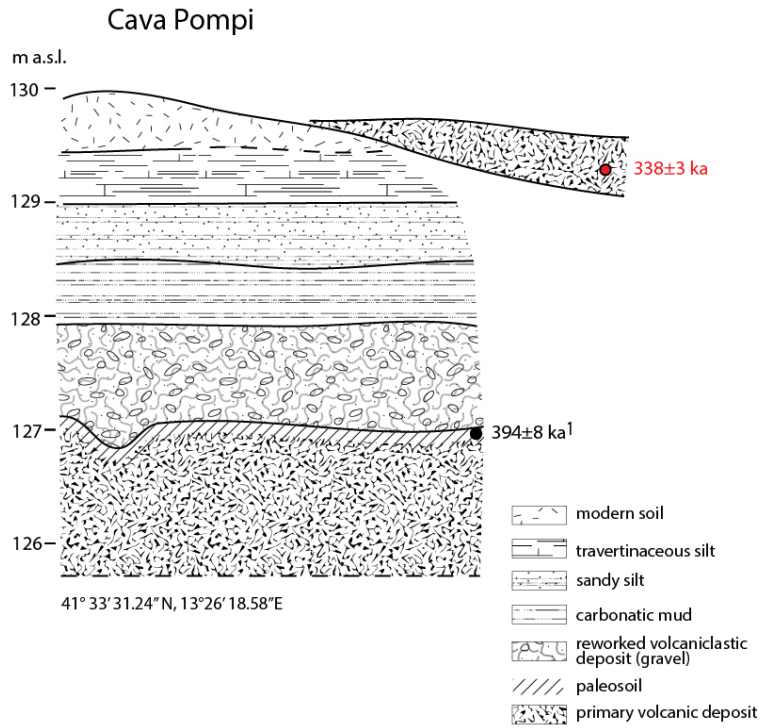

1  
2  
3  
4  
5  
6

Figure S5 - Stratigraphic sketch of Cava Pompei archaeological section. Original photograph taken by author I. Biddittu. In red,  $^{40}\text{Ar}/^{39}\text{Ar}$  age performed for the present study. References: (1) Pereira et al., 2018.

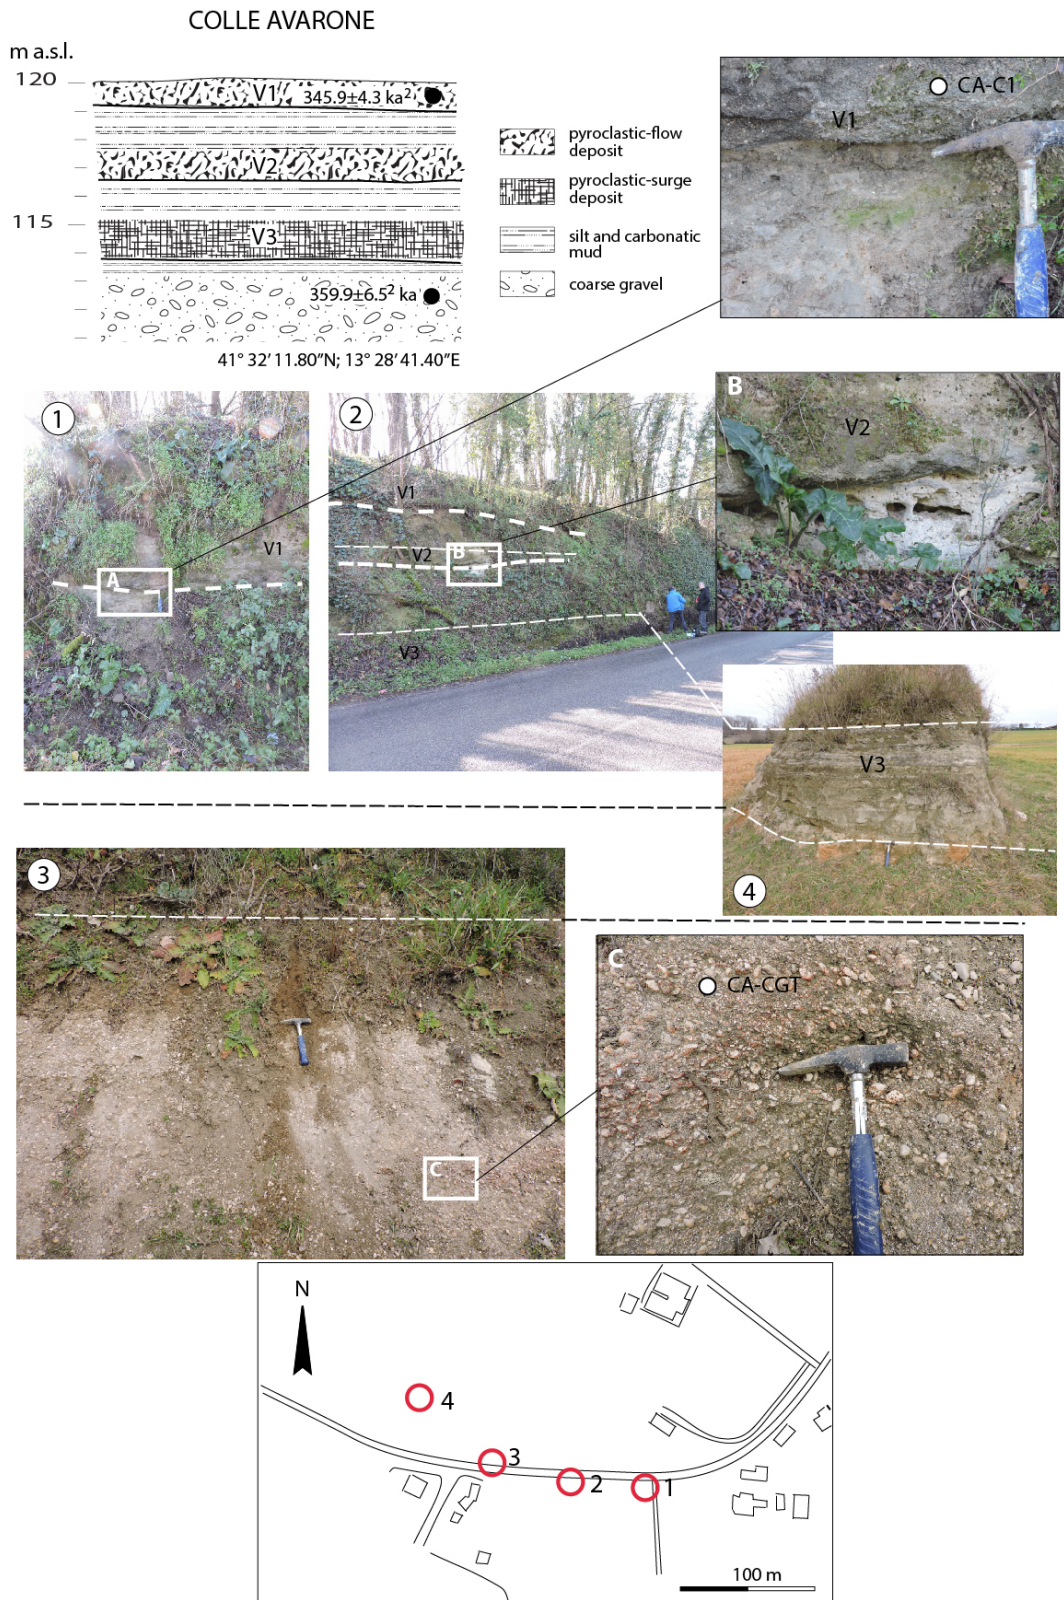

1  
2  
3  
4  
5

Figure S6 - Stratigraphic sketch of the composite Colle Avarone geological section. Photographs taken by author F. Marra. References: (2) Marra et al., 2021.



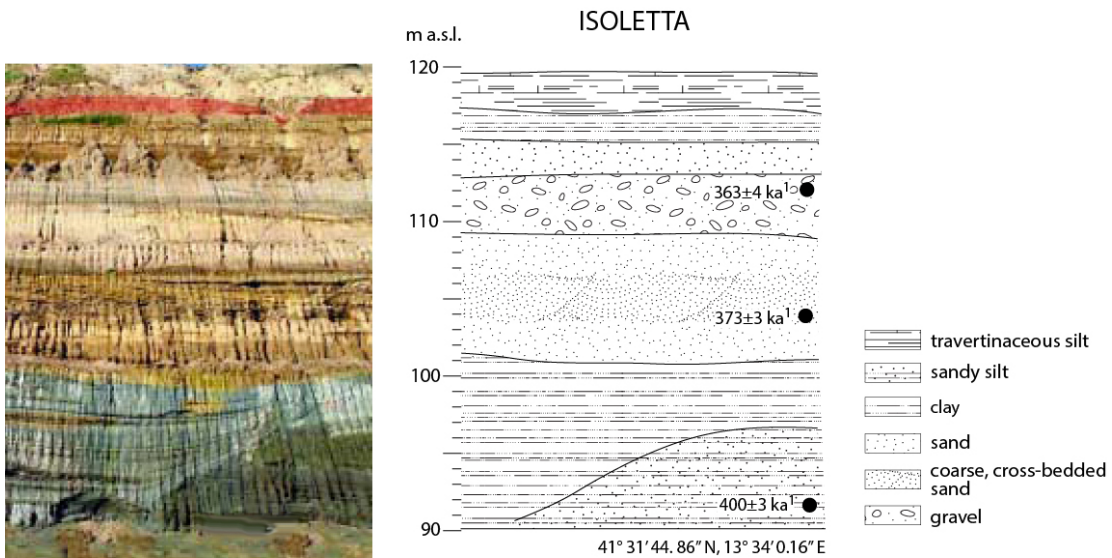

1  
2  
3  
4  
5  
6  
7

Figure S7 -Stratigraphic sketch of Isoletta geologic section. Photograph by author I. Biddittu. References: (1) Pereira et al., 2018.

LADEMAGNE 41° 31' 16.68" N, 13° 35' 0.72" E

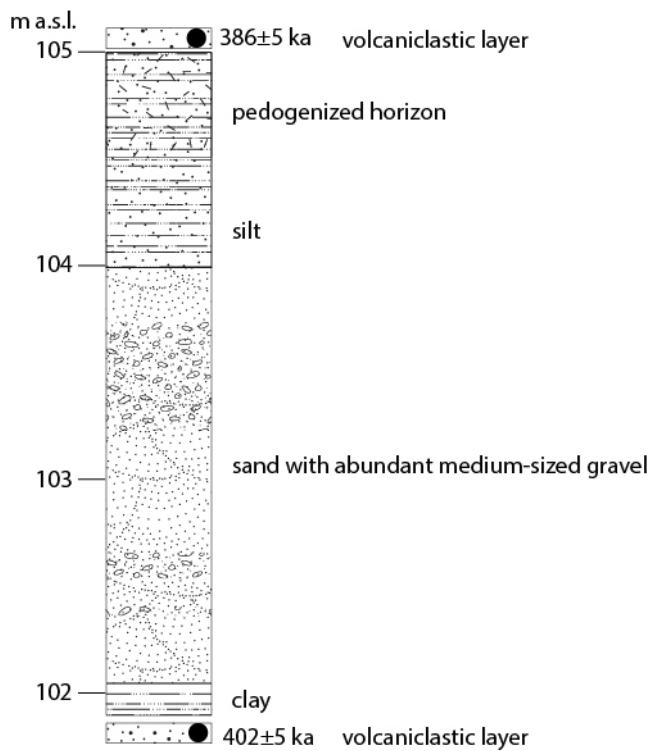

8  
9  
10  
11

Figure S8 - Stratigraphic sketch of Lademagne geological section.

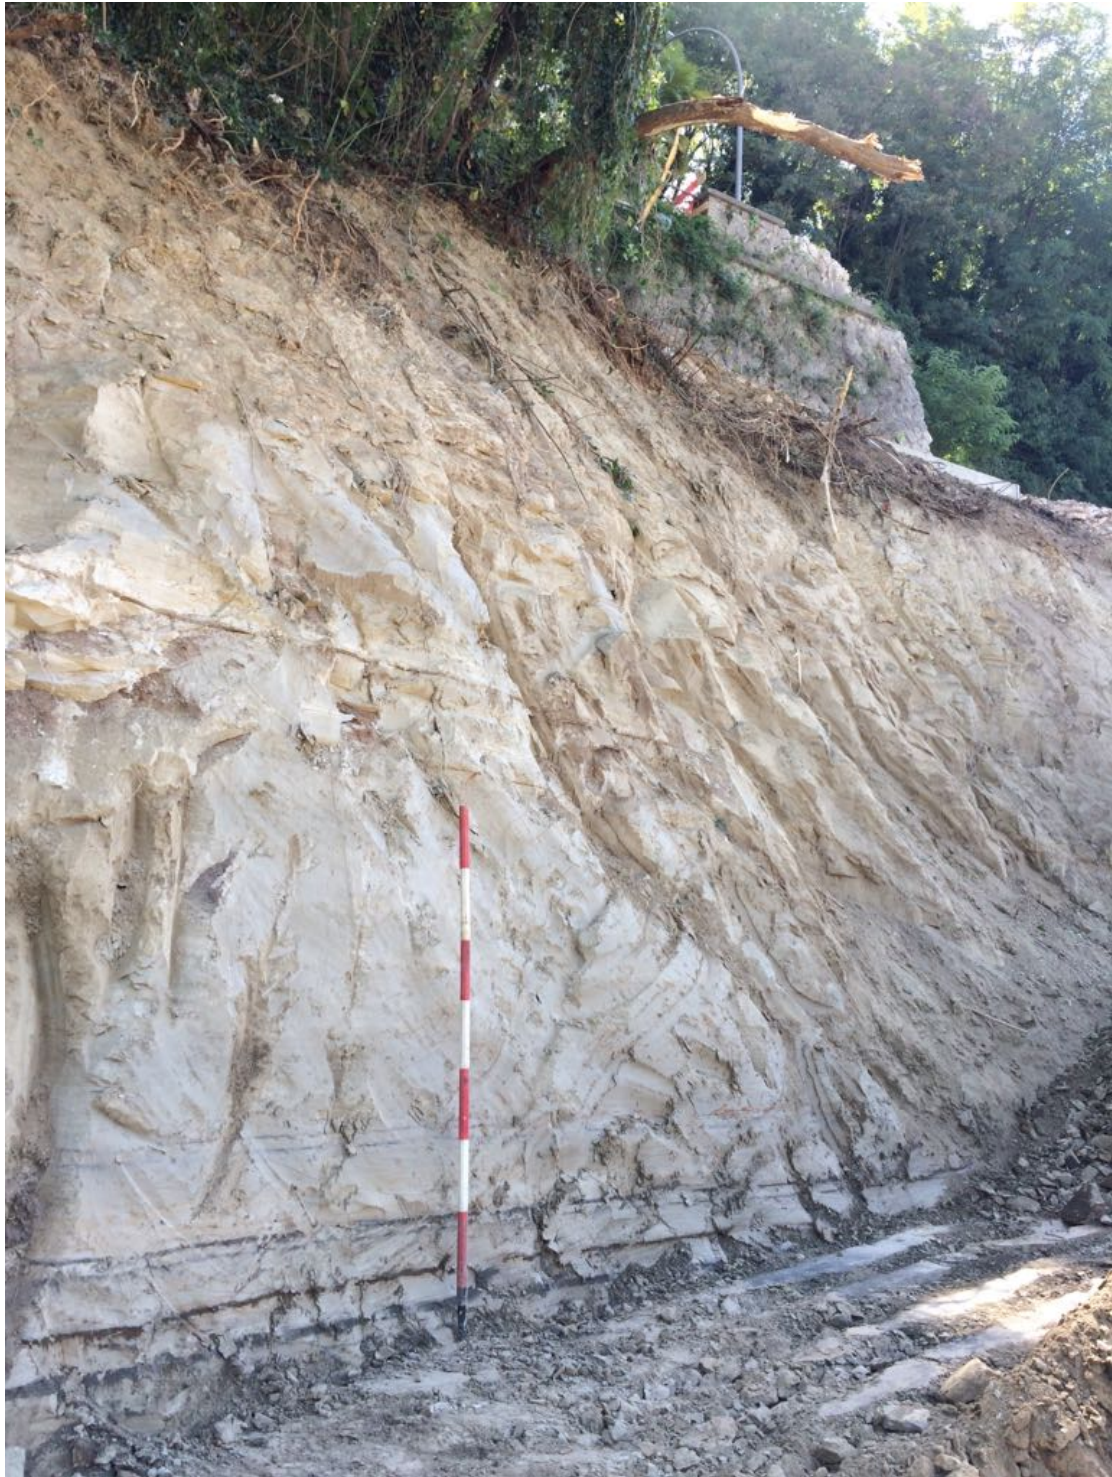

1  
2  
3  
4  
5  
6  
7  
8  
9  
10  
11

Figure S9 - Photograph taken by author I. Biddittu of the Pontecorvo outcrop showing occurrence of several tephra layers (arrow) intercalated in the Lower lacustrine succession. Two of these tephra layers were dated by K/Ar method (Narcisi, 1986).

1  
2  
3  
4  
5  
6  
7  
8  
9  
10  
11  
12  
13  
14  
15  
16  
17  
18  
19

REFERENCES

Marra, F., Cardello, L., Gaeta, M., Jicha, B., Montone, P., Niespolo, E., Nomade, S., Palladino, D.M., Pereira, A., De Luca, G., Florindo, F., Frepoli, A., Renne, P., Sottili, G., 2021. The Volsci Volcanic Field (central Italy): an open window on continental subduction processes, *International Journal of Earth Sciences* 110:689–718. DOI:10.1007/s00531-021-01981-6

Narcisi, B., 1986. Ricerche di tefracronologia nella media e bassa Valle Latina. *Mem Soc Geol It* 35, 909–912.

Pereira, A. *et al.* Geochronological evidences of a MIS 11 to MIS 10 age for several crucial Acheulian sites from the Frosinone province (Latium, Italy): Archaeological implications. *Quaternary Science Reviews* 187, 112-129 (2018).
